# Supplementary material for: Modeling the Additive Effects of Nanoparticles and Polymers on Hydrogel Mechanical Properties Using Multifactor Analysis
Source: MDPI journal article supplement (doi:10.3390/nano12244461), 2022-12-15
Supplement: s1 [file s1]

## Modeling the additive effects of nanoparticles and polymers on hydrogel mechanical properties using multifactor analysis

Emma Barrett-Catton<sup>1</sup>, Kyle Pedersen<sup>1</sup>, Maryam Mobed-Miremadi<sup>1,\*</sup>, and Prashanth Asuri<sup>1,\*</sup>

**Table S1.** Factorial design parameters for pAAm hydrogels with low Bis and high silica nanoparticle concentrations, corresponding to Figure 2a. X<sub>1</sub>: AAm concentration. X<sub>2</sub>: Bis concentration. X<sub>3</sub>: SiNP concentration.

| Pattern | X <sub>1</sub> | X <sub>2</sub> | X <sub>3</sub> | Y       | Pred Formula Y |
|---------|----------------|----------------|----------------|---------|----------------|
| 323     | 10             | 0.125          | 5              | 14363.3 | 16260.53108    |
| 123     | 2.5            | 0.125          | 5              | 2363.33 | 4868.822279    |
| 131     | 2.5            | 0.25           | 3              | 1770    | 3264.161735    |
| 122     | 2.5            | 0.125          | 4              | 2297    | 3552.712585    |
| 212     | 5              | 0.0625         | 4              | 8184    | 6648.132823    |
| 113     | 2.5            | 0.0625         | 5              | 1777    | 4986.943878    |
| 213     | 5              | 0.0625         | 5              | 12133.3 | 8132.122874    |
| 223     | 5              | 0.125          | 5              | 14363.3 | 8666.058546    |
| 133     | 2.5            | 0.25           | 5              | 2408    | 4632.579082    |
| 312     | 10             | 0.0625         | 4              | 14236   | 13234.63112    |
| 313     | 10             | 0.0625         | 5              | 12133.3 | 14422.48087    |
| 121     | 2.5            | 0.125          | 3              | 1631    | 2236.602891    |
| 332     | 10             | 0.25           | 4              | 17998   | 18514.61485    |
| 111     | 2.5            | 0.0625         | 3              | 1095    | 1722.823469    |
| 211     | 5              | 0.0625         | 3              | 6078    | 5164.142772    |
| 331     | 10             | 0.25           | 3              | 16442   | 17092.59819    |
| 333     | 10             | 0.25           | 5              | 18793.7 | 19936.63151    |
| 222     | 5              | 0.125          | 4              | 9440    | 7366.683622    |
| 311     | 10             | 0.0625         | 3              | 11303   | 12046.78138    |
| 132     | 2.5            | 0.25           | 4              | 2286    | 3948.370408    |
| 221     | 5              | 0.125          | 3              | 7736    | 6067.308699    |
| 112     | 2.5            | 0.0625         | 4              | 1608    | 3354.883674    |
| 231     | 5              | 0.25           | 3              | 9487    | 7873.640553    |
| 321     | 10             | 0.125          | 3              | 12400   | 13728.72032    |
| 322     | 10             | 0.125          | 4              | 14896   | 14994.6257     |
| 232     | 5              | 0.25           | 4              | 11983   | 8803.785221    |
| 233     | 5              | 0.25           | 5              | 12050   | 9733.92989     |

**Table S2.** Factorial design parameters for pAAm hydrogels with high Bis and high silica nanoparticle concentrations, corresponding to Figure 2b. X<sub>1</sub>: AAm concentration. X<sub>2</sub>: Bis concentration. X<sub>3</sub>: SiNP concentration.

| Pattern | X <sub>1</sub> | X <sub>2</sub> | X <sub>3</sub> | Y       | Predicted Y |
|---------|----------------|----------------|----------------|---------|-------------|
| 322     | 10             | 0.25           | 4              | 17998   | 18950.11281 |
| 323     | 10             | 0.25           | 5              | 18793.7 | 20217.08305 |
| 232     | 5              | 0.5            | 4              | 11862   | 11105.89059 |
| 213     | 5              | 0.125          | 5              | 9920    | 8014.951814 |
| 332     | 10             | 0.5            | 4              | 28891   | 28304.94388 |
| 123     | 2.5            | 0.25           | 5              | 2408    | 3881.031179 |
| 212     | 5              | 0.125          | 4              | 9440    | 7229.797052 |
| 233     | 5              | 0.5            | 5              | 12236.3 | 11949.24178 |
| 312     | 10             | 0.125          | 4              | 14896   | 14272.69728 |
| 132     | 2.5            | 0.5            | 4              | 2298    | 2506.363945 |
| 333     | 10             | 0.5            | 5              | 29471   | 29847.49745 |
| 131     | 2.5            | 0.5            | 3              | 1673    | 2012.613946 |
| 121     | 2.5            | 0.25           | 3              | 1770    | 2734.340703 |
| 231     | 5              | 0.5            | 3              | 10121   | 10262.5394  |
| 111     | 2.5            | 0.125          | 3              | 1631    | 3095.204082 |
| 112     | 2.5            | 0.125          | 4              | 2297    | 3708.346939 |
| 321     | 10             | 0.25           | 3              | 16442   | 17683.14257 |
| 223     | 5              | 0.25           | 5              | 12050   | 9326.381802 |
| 113     | 2.5            | 0.125          | 5              | 2363.33 | 4321.489796 |
| 122     | 2.5            | 0.25           | 4              | 2286    | 3307.685941 |
| 222     | 5              | 0.25           | 4              | 11983   | 8521.828231 |
| 221     | 5              | 0.25           | 3              | 9487    | 7717.27466  |
| 331     | 10             | 0.5            | 3              | 26574   | 26762.39031 |
| 211     | 5              | 0.125          | 3              | 7736    | 6444.64229  |
| 313     | 10             | 0.125          | 5              | 14363.3 | 15401.87585 |
| 133     | 2.5            | 0.5            | 5              | 2332.33 | 3000.113944 |
| 311     | 10             | 0.125          | 3              | 12400   | 13143.51871 |

**Table S3.** Factorial design parameters for pAAm hydrogels with low Bis and low silica nanoparticle concentrations, corresponding to Figure 2c. X<sub>1</sub>: AAm concentration. X<sub>2</sub>: Bis concentration. X<sub>3</sub>: SiNP concentration.

| Pattern | X <sub>1</sub> | X <sub>2</sub> | X <sub>3</sub> | Y       | Pred Formula Y |
|---------|----------------|----------------|----------------|---------|----------------|
| 323     | 10             | 0.125          | 2              | 9140.67 | 12014.34014    |
| 123     | 2.5            | 0.125          | 2              | 1065    | 2482.061224    |
| 131     | 2.5            | 0.25           | 0              | 426.67  | 1014.304989    |
| 122     | 2.5            | 0.125          | 1              | 755     | 1868.918367    |
| 212     | 5              | 0.0625         | 1              | 1858    | 4257.415391    |
| 113     | 2.5            | 0.0625         | 2              | 530     | 2642.594104    |
| 213     | 5              | 0.0625         | 2              | 3284.67 | 5032.870748    |
| 223     | 5              | 0.125          | 2              | 4720    | 5659.487528    |
| 133     | 2.5            | 0.25           | 2              | 1064    | 2160.995465    |
| 312     | 10             | 0.0625         | 1              | 5477    | 8753.141299    |
| 313     | 10             | 0.0625         | 2              | 7289.33 | 9813.424037    |
| 121     | 2.5            | 0.125          | 0              | 413.67  | 1255.77551     |
| 332     | 10             | 0.25           | 1              | 12171.7 | 15149.2021     |
| 111     | 2.5            | 0.0625         | 0              | 47.75   | 1376.51077     |
| 211     | 5              | 0.0625         | 0              | 598.33  | 3481.960034    |
| 331     | 10             | 0.25           | 0              | 10250   | 13882.23186    |
| 333     | 10             | 0.25           | 2              | 14373.3 | 16416.17234    |
| 222     | 5              | 0.125          | 1              | 3140    | 4874.332767    |
| 311     | 10             | 0.0625         | 0              | 4334.67 | 7692.858562    |
| 132     | 2.5            | 0.25           | 1              | 769.33  | 1587.650227    |
| 221     | 5              | 0.125          | 0              | 1946.67 | 4089.178005    |
| 112     | 2.5            | 0.0625         | 1              | 283.67  | 2009.552437    |
| 231     | 5              | 0.25           | 0              | 3665.67 | 5303.613946    |
| 321     | 10             | 0.125          | 0              | 6577.33 | 9755.982995    |
| 322     | 10             | 0.125          | 1              | 7844    | 10885.16157    |
| 232     | 5              | 0.25           | 1              | 4769    | 6108.167518    |
| 233     | 5              | 0.25           | 2              | 6706.67 | 6912.721089    |

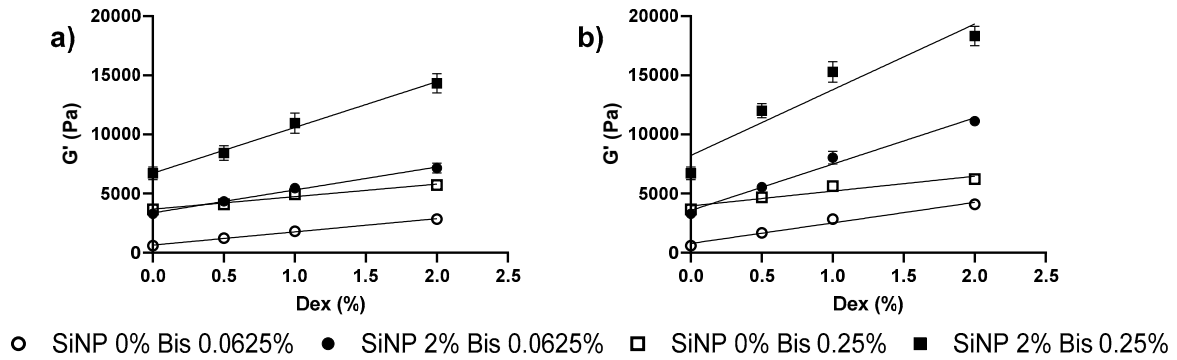

**Figure S1.** Elastic Moduli ( $G'$ ) of pAAm hydrogel nanocomposites as a function of dextran concentration prepared using different concentrations of silica nanoparticles and Bis crosslinker, and different molecular weights of dextran (a) 100 kDa and (b) 500 kDa.

**Table S4:** Linear regression parameters for elastic moduli of pAAm hydrogel nanocomposites plotted against dextran concentration for samples prepared using different concentrations of silica nanoparticles and Bis crosslinker, and different molecular weights of dextran (a) 100 kDa and (b) 500 kDa.

| Hydrogel Properties |                       |                        | Linear Regression Parameters |                |
|---------------------|-----------------------|------------------------|------------------------------|----------------|
| Dextran MW (kDa)    | Bis Concentration (%) | SiNP Concentration (%) | Slope                        | R <sup>2</sup> |
| 100                 | 0.0625                | 0                      | 1117                         | 0.9814         |
|                     |                       | 2                      | 1940                         | 0.9648         |
|                     | 0.25                  | 0                      | 1059                         | 0.8740         |
|                     |                       | 2                      | 3871                         | 0.9534         |
| 500                 | 0.0625                | 0                      | 1739                         | 0.9656         |
|                     |                       | 2                      | 3920                         | 0.9792         |
|                     | 0.25                  | 0                      | 1257                         | 0.8500         |
|                     |                       | 2                      | 5561                         | 0.8943         |

**Table S5.** MANOVA results summarized by response in terms of p-values.

| <b>Variable</b>                             | <b>G'</b> | <b>G''</b> | <b>Tan(<math>\delta</math>)</b> |
|---------------------------------------------|-----------|------------|---------------------------------|
| <b>Bis concentration (x<sub>1</sub>)</b>    | 0.00      | 0.06       | 0.00                            |
| <b>SiNP concentration (x<sub>2</sub>)</b>   | 0.00      | 0.00       | 0.00                            |
| <b>Dex molecular weight (x<sub>3</sub>)</b> | 0.02      | 0.60       | 0.19                            |
| <b>Dex Concentration (x<sub>4</sub>)</b>    | 0.00      | 0.00       | 0.01                            |
